# Supplementary material for: Co–Cr bimetallic oxides derived from layered double hydroxides with high catalytic performance for chlorinated aromatics oxidation
Source: Royal Society of Chemistry journal article supplement (doi:10.1039/d1cy00791b), 2021-01-01
Supplement: d1cy00791b1.pdf [file d1cy00791b1.pdf]

**Co-Cr bimetallic oxide derived from layered double hydroxides with high  
catalytic performance for chlorinated aromatics oxidation**

Wei Deng, Biao Gao, Ziyue Jia, Dongqi Liu\* and Limin Guo\*

School of Environmental Science and Engineering, Huazhong University of Science and  
Technology, Wuhan 430074, PR China

\*Corresponding author: liudongqi@hust.edu.cn, limguo@hust.edu.cn

**Table S1 Comparison of rate and Ea with literatures**

| Catalyst                                             | T <sub>90</sub> | Rate                                     | Ea     | Condition                                                                   | Ref       |
|------------------------------------------------------|-----------------|------------------------------------------|--------|-----------------------------------------------------------------------------|-----------|
|                                                      | / °C            | / μmol min <sup>-1</sup> m <sup>-2</sup> | kJ/mol |                                                                             |           |
| Ce <sub>0.5</sub> Ti <sub>0.5</sub>                  | 375             | 0.053 at 275 °C                          | 95.7   | 1000 ppm DCB <sup>a</sup> , GHSV = 30000 mL g <sup>-1</sup> h <sup>-1</sup> | 1         |
| 3.6% V <sub>2</sub> O <sub>5</sub> /TiO <sub>2</sub> | 360             | 0.084 at 275 °C                          |        | 500 ppm DCB GHSV = 53000 mL g <sup>-1</sup> h <sup>-1</sup>                 | 2         |
| Cr <sub>0.1</sub> Ti <sub>0.9</sub>                  | 296             | 0.237 at 275 °C                          | 66.0   | 1000 ppm DCB GHSV = 30000 mL g <sup>-1</sup> h <sup>-1</sup>                | 3         |
|                                                      |                 | 0.050 at 225 °C                          |        |                                                                             |           |
| 0.6Ru/Co <sub>3</sub> O <sub>4</sub>                 | 303             | 0.151 at 250 °C                          |        | 1000 ppm DCB GHSV = 30000 mL g <sup>-1</sup> h <sup>-1</sup>                | 4         |
| Co <sub>9</sub> Mn <sub>1</sub>                      | 347             | 0.033 at 250 °C                          | 88.3   | 1000 ppm DCB GHSV = 15000 mL g <sup>-1</sup> h <sup>-1</sup>                | 5         |
| FeMn <sub>20</sub>                                   | 400             |                                          |        | 50 ppm DCB, GHSV = 88,000 mL g <sup>-1</sup> h <sup>-1</sup>                | 6         |
| FeCa <sub>10</sub>                                   | 400             |                                          | 21.6   | 50 ppm DCB, GHSV = 88,000 mL g <sup>-1</sup> h <sup>-1</sup>                | 7         |
| Co <sub>3</sub> Cr                                   | 288             | 0.170 at 250 °C                          | 87.3   | 1000 ppm DCB GHSV = 60000 mL g <sup>-1</sup> h <sup>-1</sup>                | This work |

<sup>a</sup> 1, 2-dichlorobenzene

## References

- [1] W. Deng, Q.G. Dai, Y.J. Lao, B.B. Shi, X.Y. Wang, Low temperature catalytic combustion of 1,2-dichlorobenzene over CeO<sub>2</sub>-TiO<sub>2</sub> mixed oxide catalysts, *Appl. Catal. B: Environ.* 181 (2016) 848–861.
- [2] C. Gannoun, A. Turki, H. Kochkar, R. Delaigle, P. Eloy, A. Ghorbel, E.M. Gaigneaux, Elaboration and characterization of sulfated and unsulfated V<sub>2</sub>O<sub>5</sub>/TiO<sub>2</sub> nanotubes catalysts for chlorobenzene total oxidation, *Appl. Catal. B: Environ.* 147 (2014) 58–64.
- [3] Wei Sun, Binwei Gong, Jun Pan, Yangyang Wang, Hangqi Xia, Hao Zhang, Qiguang Dai, Li Wang, Xingyi Wang, Catalytic combustion of CVOCs over Cr<sub>x</sub>Ti<sub>1-x</sub> oxide catalysts, *J. Catal.*, 391 (2020) 132–144
- [4] Yijie Lao, Naxin Zhu, Xingxing Jiang, Jian Zhao, Qiguang Dai, Xingyi Wang, Effect of Ru on the activity of Co<sub>3</sub>O<sub>4</sub> catalysts for chlorinated aromatics oxidation, *Catal. Sci. Technol.*, 2018,8, 4797-4811
- [5] Ting Cai, Hao Huang, Wei Deng, Qiguang Dai, Wei Liu, Xingyi Wang, Catalytic combustion of 1,2-dichlorobenzene at low temperature over Mn-modified Co<sub>3</sub>O<sub>4</sub> catalysts, *Applied Catalysis B: Environmental* 166–167 (2015) 393–405.
- [6] Xiaodong Ma, Jiaxin Wen, Haiwei Guo, Gengbo Ren, Facile template fabrication of Fe-Mn mixed oxides with hollow microsphere structure for efficient and stable catalytic oxidation of 1,2-dichlorobenzene, *Chemical Engineering Journal* 382 (2020) 122940.
- [7] Xiaodong Ma, Xi Feng, Jie Guo, Huiqin Cao, Xueyue Suo, Hongwen Sun, Meihua Zheng, Catalytic oxidation of 1,2-dichlorobenzene over Ca-doped FeOx hollow microspheres, *Applied Catalysis B: Environmental* 147 (2014) 666–676.

## Calculation of Rate

Rate at 250 °C based on the converted mole number of 1, 2-dichlorobenzene per minutes per square shown in Table 2 and S1. Reaction condition: feed, 100 mL min<sup>-1</sup>; 1000 ppm 1, 2-dichlorobenzene, 10 vol. % O<sub>2</sub> and N<sub>2</sub> in balance; catalyst: 100 mg

### For example

#### For Co<sub>3</sub>O<sub>4</sub>:

DCB conversion at 250 °C: 5.3%, S<sub>BET</sub>: 30 m<sup>2</sup>/g

**Rate** = DCB concentration × feed × conversion / (22.4 × m<sub>cat</sub> × S<sub>BET</sub>) = 1000 × 100 × 10<sup>-3</sup> × 5.3 × 10<sup>-2</sup> / (22.4 × 0.1 × 30) = 0.08 μmol·min<sup>-1</sup>·m<sup>-2</sup>

## Characterization of Co<sub>3</sub>Cr mixed oxides synthesized by different methods and their performance for 1, 2-dichlorobenzene combustion:

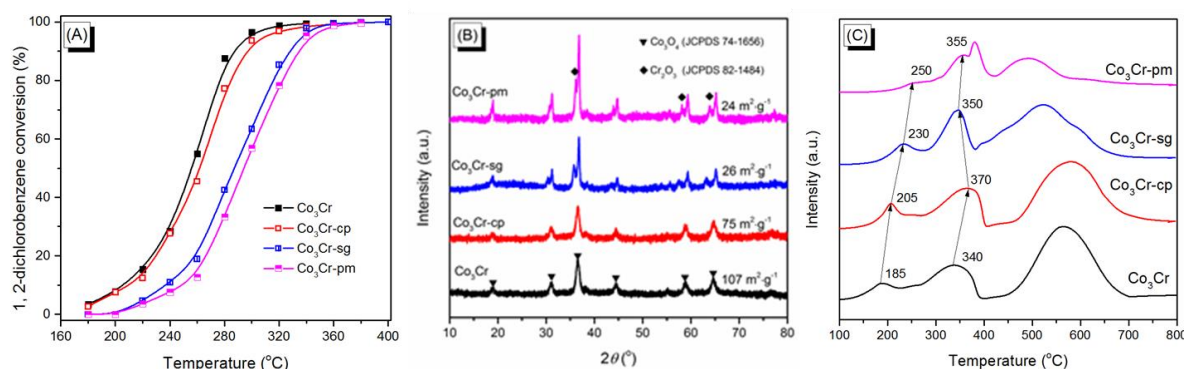

**Fig. S1** The activity test for 1, 2-dichlorobenzene combustion (A), the XRD pattern (B) and the H<sub>2</sub>-TPR profiles (C) of CoCr mixed oxides with Co/Cr=3 (mole) synthesized by different methods. Gas composition: 1000 ppm 1, 2-dichlorobenzene, 10 vol. % O<sub>2</sub> and N<sub>2</sub> balance; GHSV: 60,000 mL g<sup>-1</sup> · h<sup>-1</sup>; catalyst amount: 100 mg.

**Methods:** The Co<sub>3</sub>Cr was synthesized by a hydrotalcite derived methods as discribed in the present paper. The Co<sub>3</sub>Cr-cp was synthesized by a co-precipitation method using ammonium hydroxide (NH<sub>4</sub>OH) as the precipitator and the final pH was maintained at about 9.0. The Co<sub>3</sub>Cr-sg was prepared from a sol-gel method using using citric acid as a chelating agent. The Co<sub>3</sub>Cr-pm was just obtained from the calcination of their physical mixtures, before calcination, the metal nitrate precursors mixed through a grinding process with grinding duration of 5 min. All the prepared samples was calcinated at 400 °C for 4h with the same ramping rate of 2 °C per minute.

**Results and Discussion:** The activity test for combustion of 1, 2-dichlorobenzene with 1000 ppm in the flow gas under GHSV=60000 mL g<sup>-1</sup> · h<sup>-1</sup> illustrated that CoCr mixed oxides synthesized from different methods showed a high activity, of which, T<sub>90</sub> (temperature for 90% conversion) could be obtained before 400 °C, indicating that the CoCr mixed oxide itself was an active catalyst for 1, 2-dichlorobenzene combustion. However, the apparant activity of each catalyst was quite different, among them, the Co<sub>3</sub>Cr showed a highest activity with T<sub>90</sub> of 288 °C, which was higher or comparable to Ru/Co<sub>3</sub>O<sub>4</sub> with high efficient for 1, 2-dichlorobenzene abatement [Table S1, Ref. 4]. The different performance of each catalyst for 1, 2-dichlorobenzene combustion might be ascribed for the existence of metal oxides (Fig. 1S B , pure spinel phase for Co<sub>3</sub>Cr and Co<sub>3</sub>Cr-cp, coexistence of Co<sub>3</sub>O<sub>4</sub> and Cr<sub>2</sub>O<sub>3</sub> for Co<sub>3</sub>Cr-sg and Co<sub>3</sub>Cr-pm), different specific surface area (Fig. 1S B ) and different redox properties (Fig. 1S C )

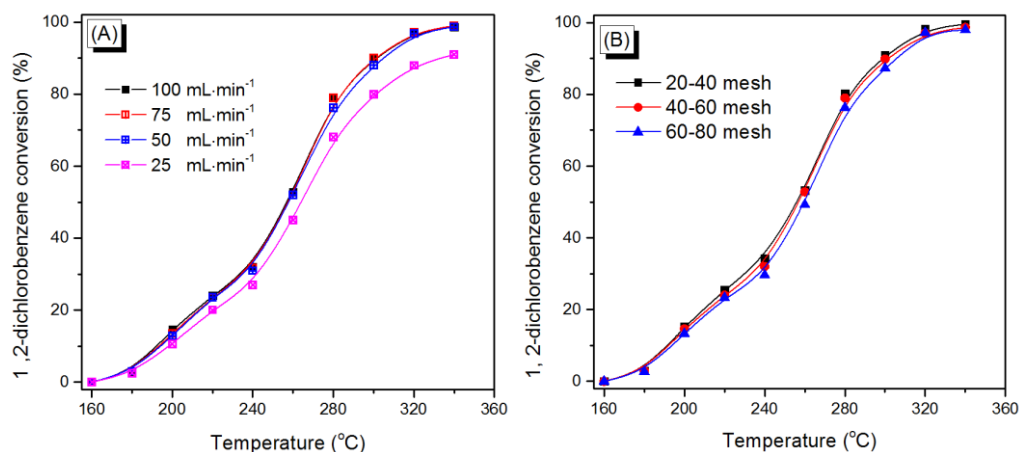

**Fig. S2** Effect of gas flow on 1, 2-dichlorobenzene oxidation over  $\text{Co}_5\text{Cr}$  (A); gas composition: 10 vol. %  $\text{O}_2$  and  $\text{N}_2$  balance; 1, 2-dichlorobenzene liquid flow:  $30 \mu\text{L h}^{-1}$ ; GHSV:  $60,000 \text{ mL g}^{-1} \cdot \text{h}^{-1}$ ; gas flow:  $25\text{-}100 \text{ mL min}^{-1}$ . Effect of particle size of  $\text{Co}_5\text{Cr}$  catalyst on 1, 2-dichlorobenzene oxidation (B); gas composition: 1000 ppm 1, 2-dichlorobenzene, 10 vol. %  $\text{O}_2$  and  $\text{N}_2$  balance; GHSV:  $60,000 \text{ mL g}^{-1} \text{ h}^{-1}$ ; catalyst amount: 100 mg.

**Discussion:** As shown in Fig. S2A, changing the gas flow rate from  $50 \text{ mL min}^{-1}$  to  $100 \text{ mL min}^{-1}$ , the conversion of 1, 2-dichlorobenzene was kept essentially the same, meaning that there was no external mass transfer resistance for 1, 2-dichlorobenzene oxidation. However, when the flow rate lower to  $25 \text{ mL min}^{-1}$ , indicating that the external mass transfer had a negative impact on 1, 2-dichlorobenzene oxidation, especially for the high temperature range. Similarly, changing the particle size from 20-80 mesh, the conversion of 1, 2-dichlorobenzene changed a little, meaning that the internal diffusion resistance could be eliminated. Totally, the given conditions for 1, 2-dichlorobenzene oxidation in the manuscript could effectively eliminate the internal diffusion and external mass transfer resistances.

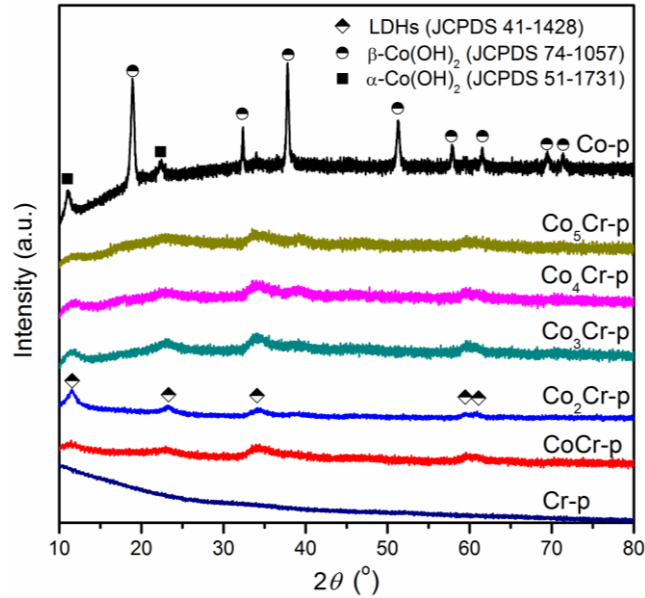

**Fig. S3** XRD patterns of as-synthesized precursors

**Discussion:** The XRD patterns of synthesized precursors were shown in Fig. S3. The patterns presented some different characteristics with the variation of Co/Cr ratio. The Co-p showed the coexistence of  $\alpha$ -Co(OH)<sub>2</sub> (JCPDS 51-1731) with brucite-like structure and  $\beta$ -Co(OH)<sub>2</sub> (JCPDS 74-1057) under high basicity [Z.P. Xu and H.C. Zeng, Interconversion of Brucite-like and Hydroxalcalcite-like Phases in Cobalt Hydroxide Compounds, *Chem. Mater.*, 1999, **11**, 67-74]. With the addition of Cr, the Co<sub>x</sub>Cr-p (x=1~5) showed a typical LDHs structure, but the intensity of the peaks changed with the variation of Co/Cr ratio. As reported, pure hydroxalcalcite phase generally could be obtained in a narrow range of  $[M^{3+}]/([M^{3+}]+[M^{2+}])$  between 0.2~0.33. Otherwise, side products could be formed [X. D and D.G. Evans, Layered Double Hydroxides, 2006, **119**]. However, it was undeniable that even the Co/Cr ratio varied from 1 to 5 (the corresponding  $[Cr^{3+}]/([Cr^{3+}]+[Co^{2+}])$  was 0.16~0.5), no other peaks were detected, indicating that the extra Co or Cr species presented amorphous structure or poor crystalline. The characteristic diffractions of Cr-p showed amorphous.

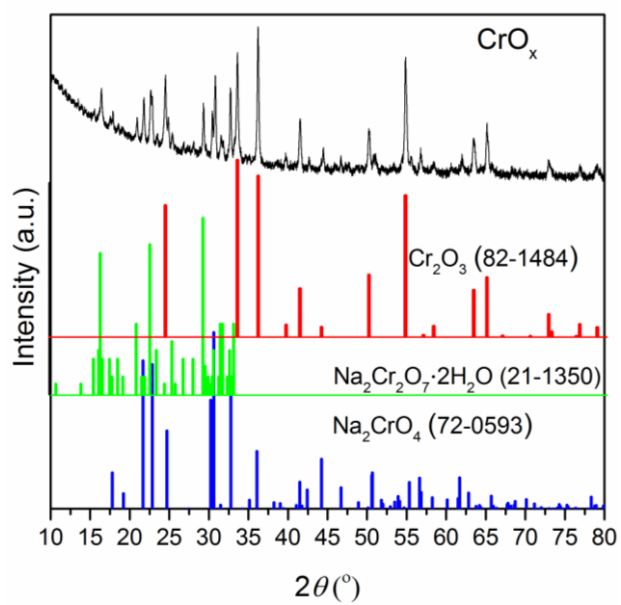

**Fig. S4** XRD pattern of as-synthesized  $\text{CrO}_x$

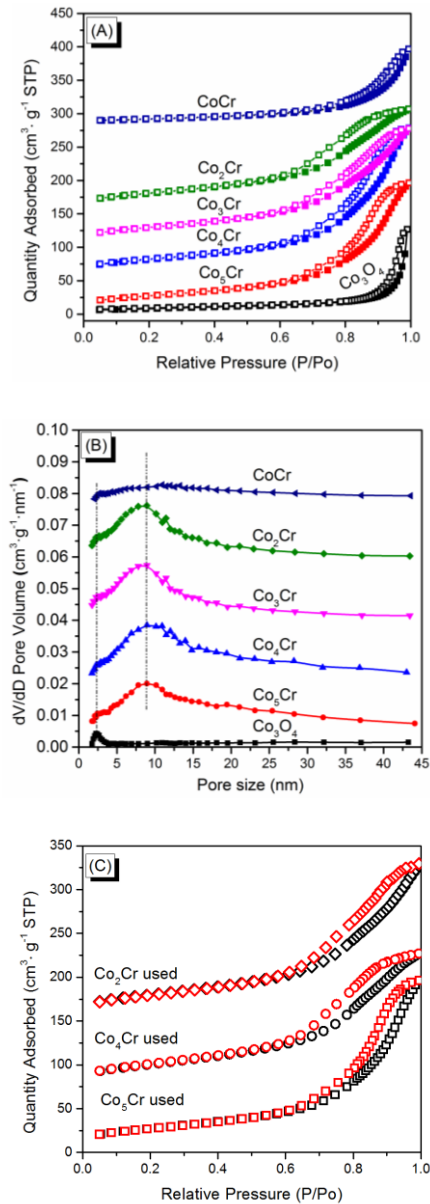

**Fig. S5** N<sub>2</sub> sorption isotherms (A), pore size distributions (B) for fresh catalysts and N<sub>2</sub> sorption isotherms (C) for used catalysts

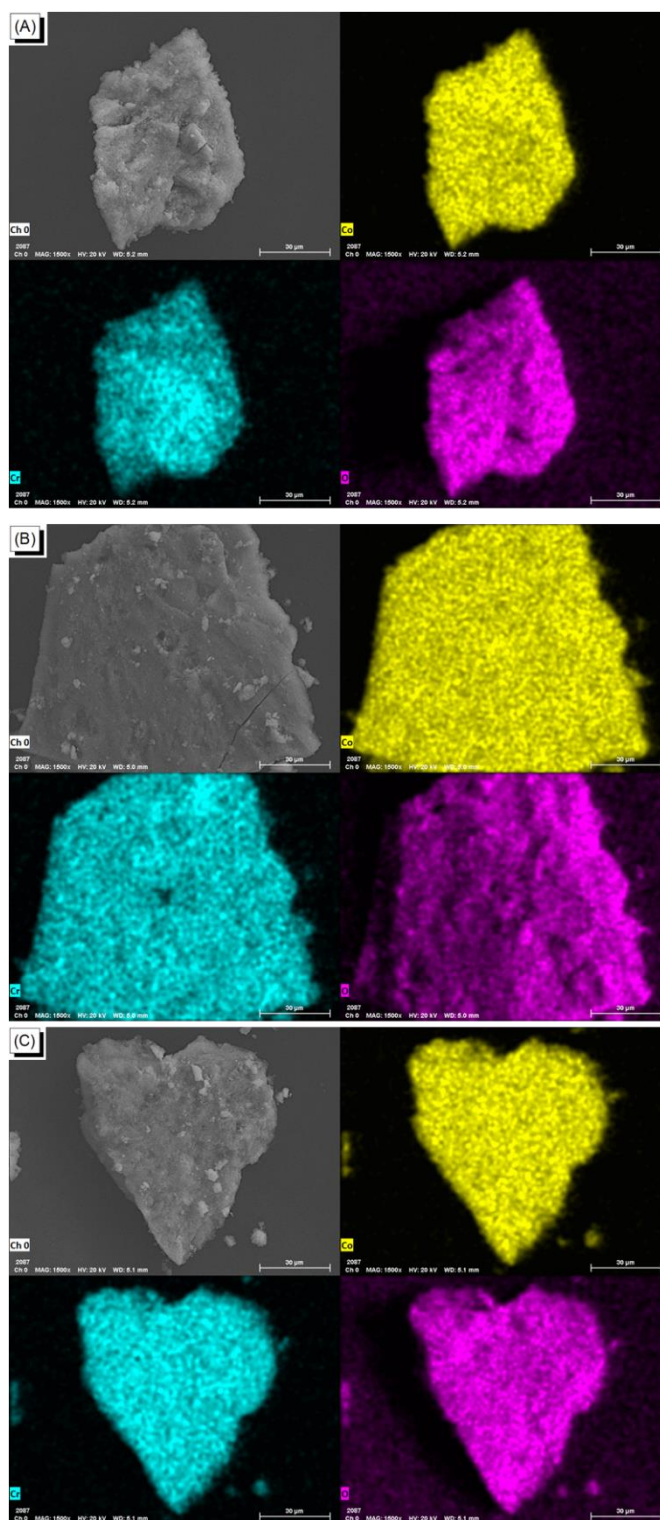

**Fig. S6** The SEM images and elemental mappings of as-prepared samples: (A) Co<sub>5</sub>Cr, (B) Co<sub>3</sub>Cr and (C) CoCr.



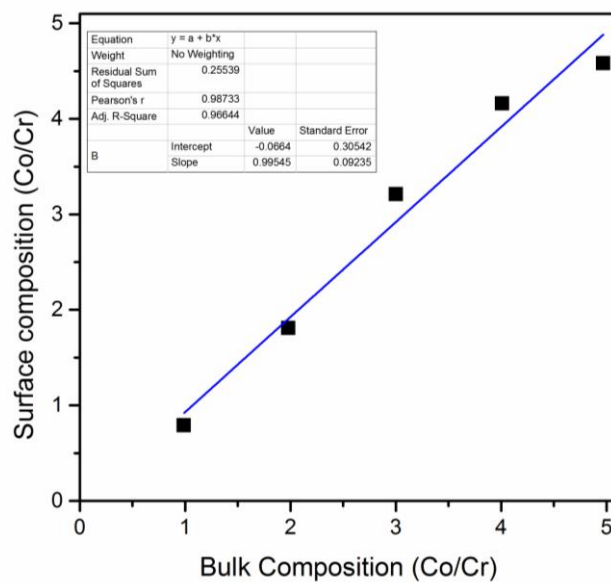

**Fig. S7** Surface ratio of Co/Cr as a function of bulk composition of Co-Cr mixed oxides.

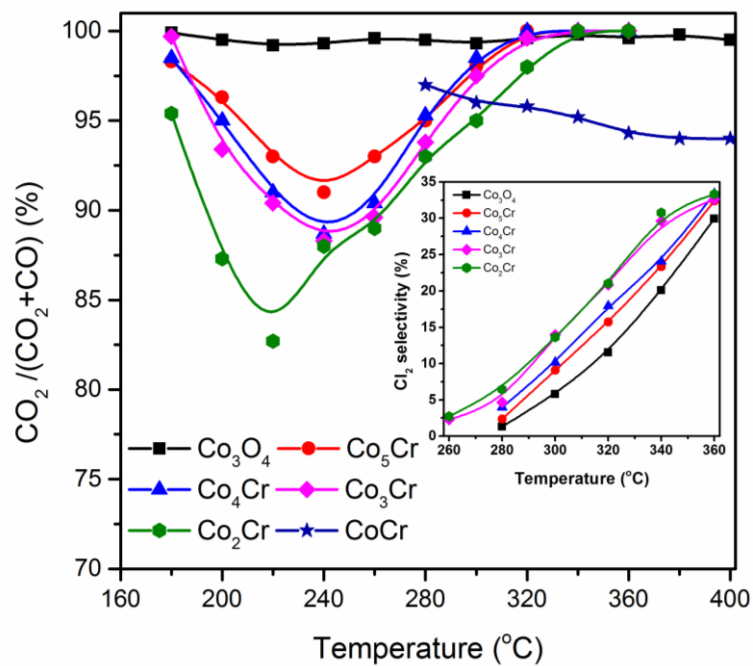

**Fig. S8** The CO<sub>2</sub> to CO<sub>x</sub> (CO<sub>2</sub>+CO) and selectivity of Cl<sub>2</sub> on cobalt based catalysts. Gas composition: 1000 ppm 1, 2-dichlorobenzene, 10 vol. % O<sub>2</sub> and N<sub>2</sub> balance; GHSV: 60,000 mL g<sup>-1</sup> · h<sup>-1</sup>; catalyst amount: 100 mg.

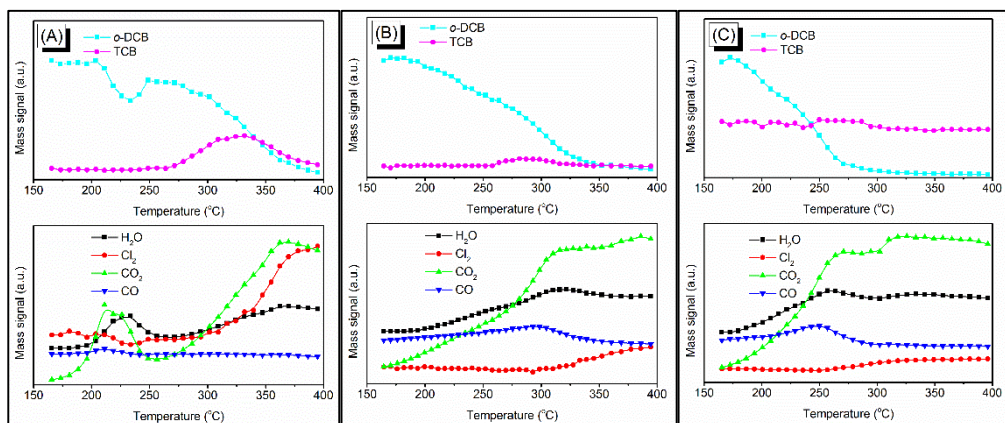

**Fig. S9** Temperature-programmed surface oxidation reaction curves (TPSR) of 1, 2-dichlorobenzene (*o*-DCB) combustion over  $\text{Co}_3\text{O}_4$  (A),  $\text{Co}_5\text{Cr}$  (B) and  $\text{Co}_2\text{Cr}$  (C); Gas composition: 1000 ppm, 1, 2-dichlorobenzene (*o*-DCB), 10 vol. %  $\text{O}_2$  and Ar balance; GHSV = 30,000  $\text{mL g}^{-1} \text{h}^{-1}$ ; catalyst amount: 100 mg.

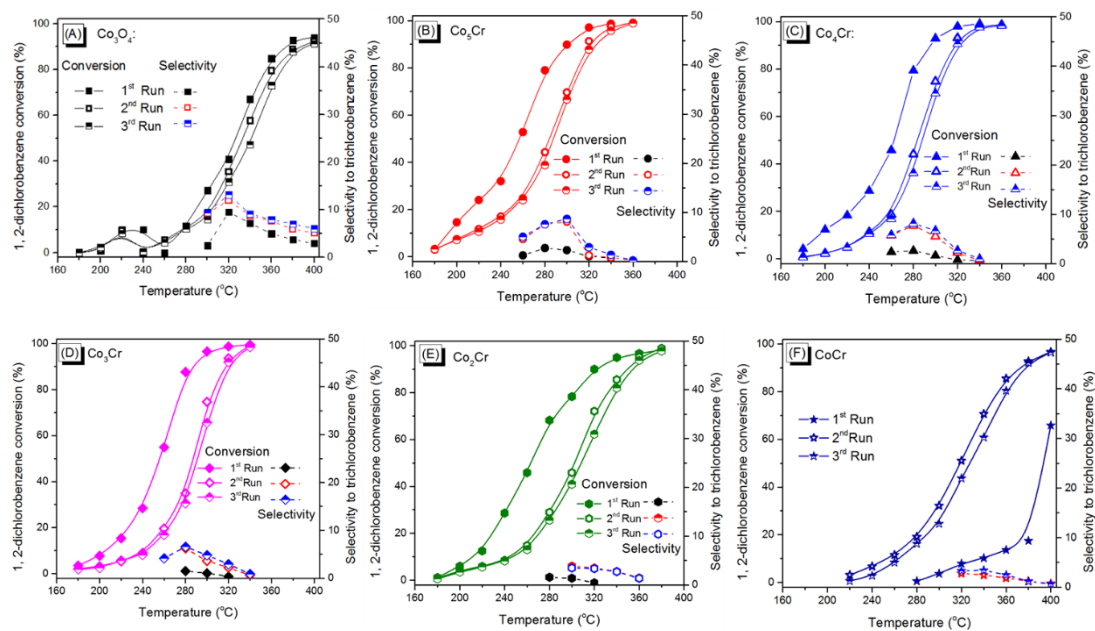

**Fig. S10** Recycling experiments for 1, 2-dichlorobenzene oxidation and 1, 2, 4-trichlorobenzene selectivity over as-prepared catalysts. Gas composition: 1000 ppm 1, 2-dichlorobenzene, 10 vol. % O<sub>2</sub> and N<sub>2</sub> balance; GHSV: 60,000 mL g<sup>-1</sup> · h<sup>-1</sup>; catalyst amount: 100 mg.

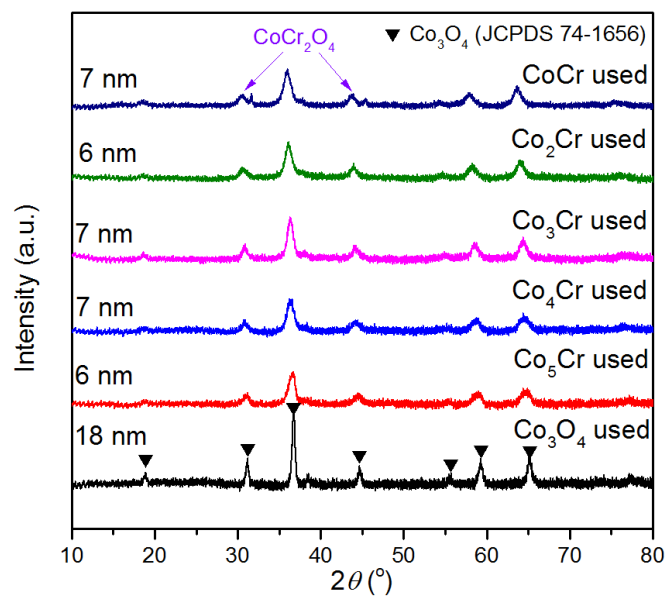

**Fig. S11** The XRD patterns of used catalysts after recycling tests.

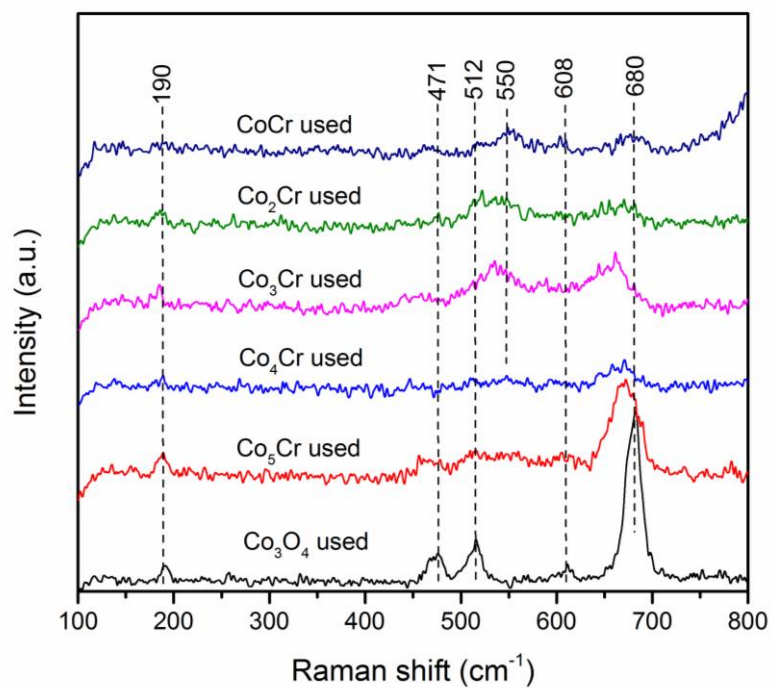

**Fig. S12** The Raman spectra for used catalysts after recycling tests.

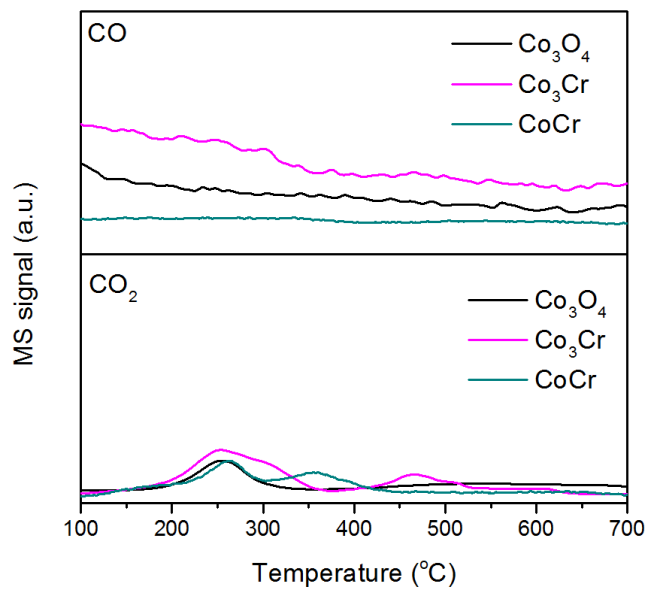

**Fig. S13** O<sub>2</sub>-TPO-MS profiles for CO<sub>2</sub> and CO of the used Co<sub>3</sub>O<sub>4</sub>, Co<sub>3</sub>Cr and CoCr catalysts after stability test.

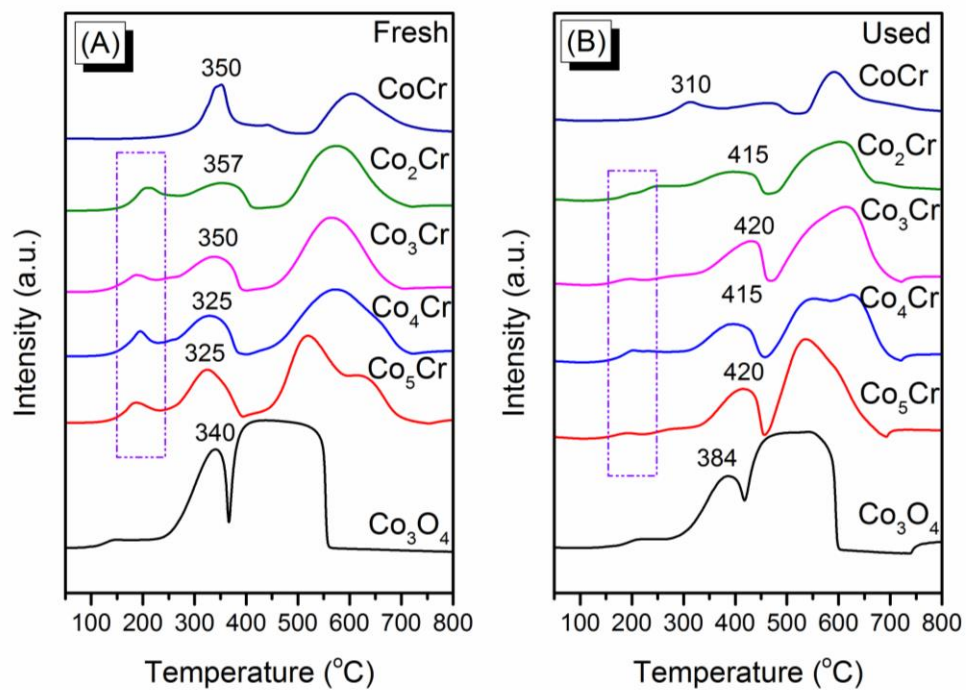

**Fig. S14** The H<sub>2</sub>-TPR profiles of fresh and used catalysts.



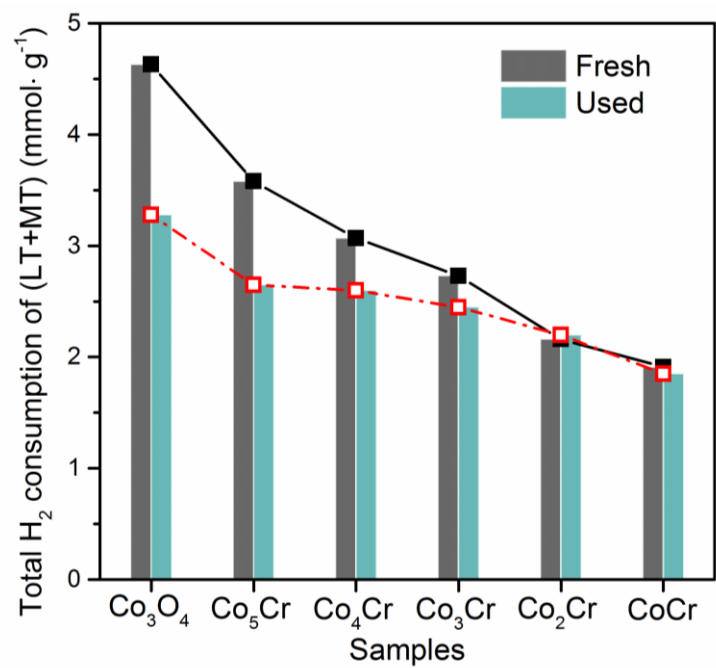

**Fig. S15** The total H<sub>2</sub> consumption for fresh and used catalysts.

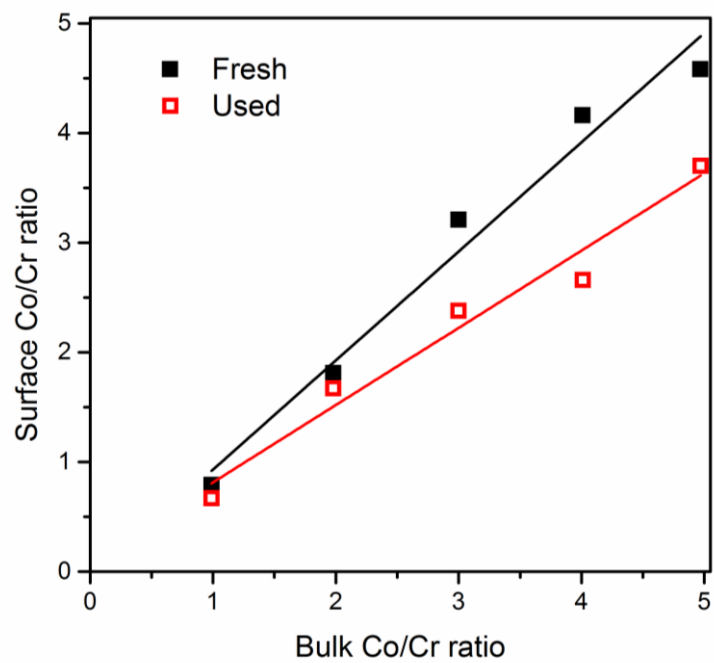

**Fig. S16** Surface Co/Cr ratio relevant to their bulk ratio for fresh and used catalysts

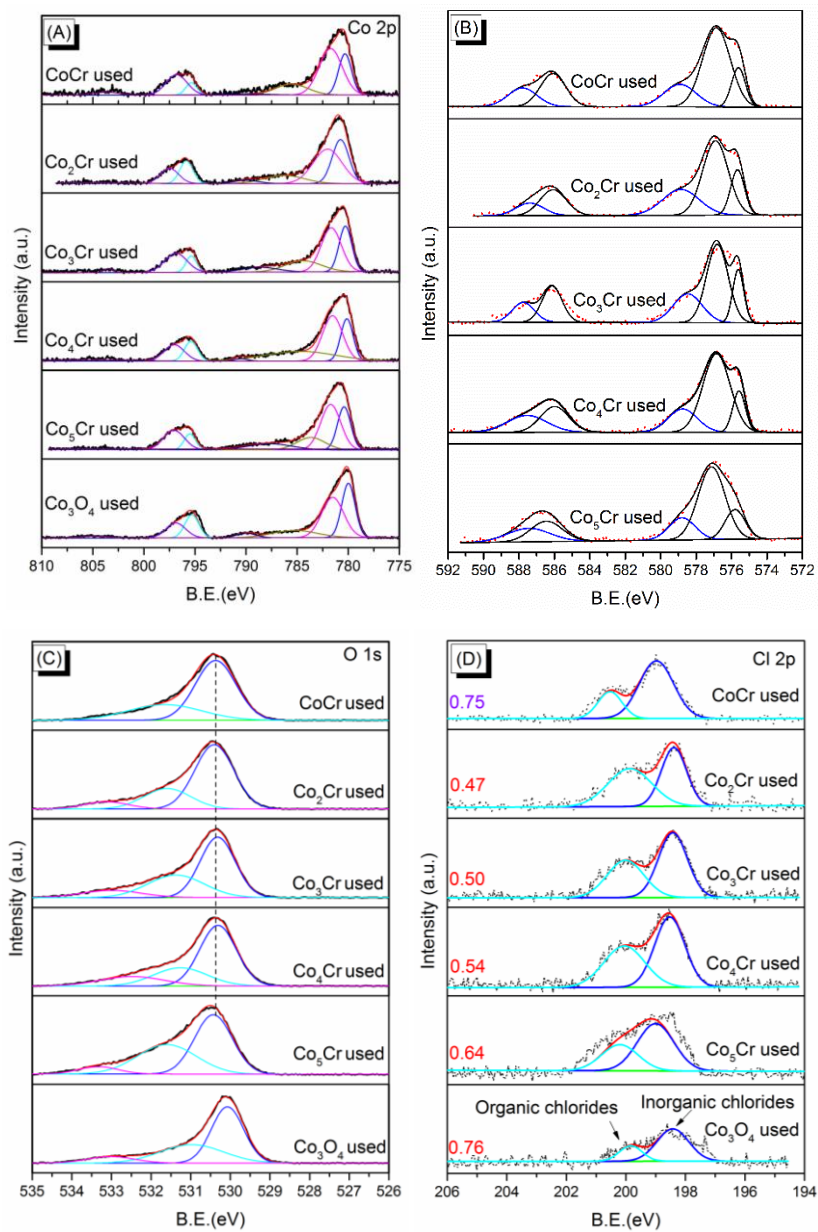

**Fig. S17** XPS spectra of Co 2p, Cr 2p, O 1s and Cl 2p for used samples.

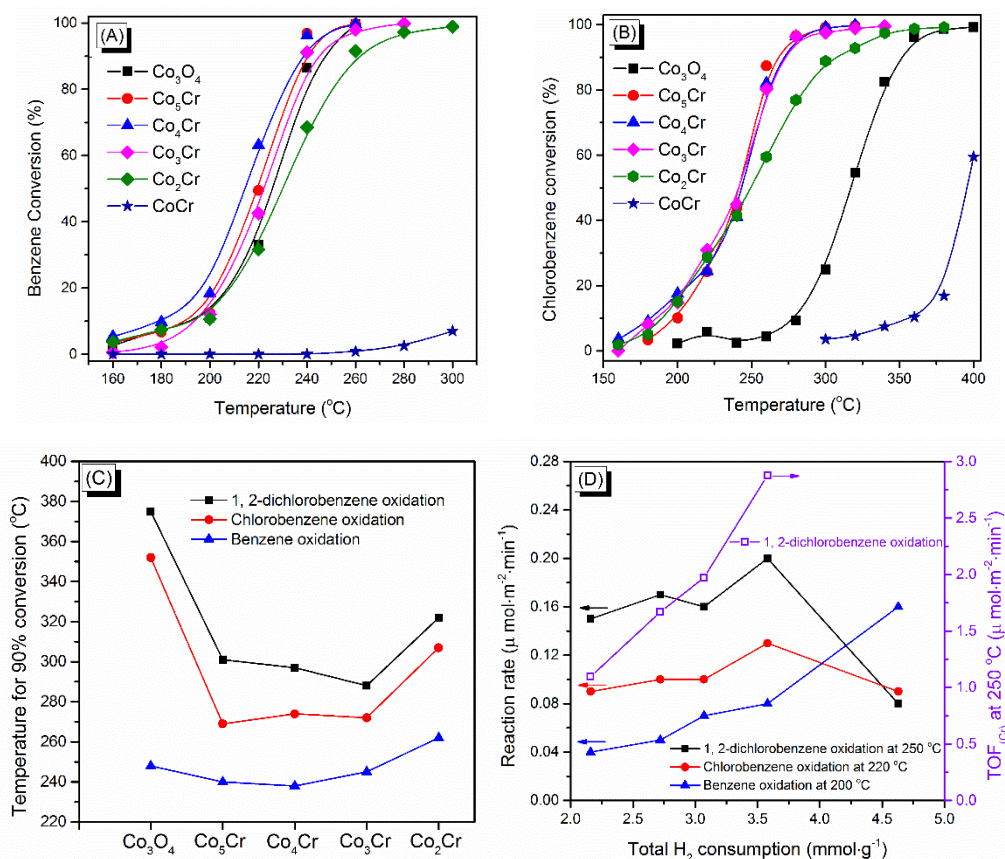

**Fig. S18** Catalytic combustion of benzene (A), chlorobenzene (B) and  $T_{90}$  for benzene/Chlorobenzene/1, 2-dichlorobenzene oxidation versus total  $H_2$  consumption (C) over cobalt based catalysts, Reaction rate at designated temperature for aromatics oxidation and  $TOF_{(Cr)}$  for 1, 2-dichlorobenzene oxidation at 250 °C versus total  $H_2$  consumption (D). Conditions: 1000 ppm VOCs, 10 vol. %  $O_2$  and  $N_2$  balance; GHSV = 60000 mL  $g^{-1} h^{-1}$ .

**Discussion:** The light off curves for aromatics oxidation, the  $T_{90}$  for aromatics oxidation, reaction rate at designated temperature and  $TOF_{(Cr)}$  (the value based on the rate per square meter normalized by Cr% on surface obtained from XPS data) at 250 °C for 1, 2-dichlorobenzene versus total  $H_2$  consumption was also presented in Fig. S18. The  $T_{90}$  for chlorinated aromatics showed no obvious association to total  $H_2$  consumption confirmed that the reducibility of the cobalt based catalysts was not the only one factor for the apparent activity. The  $Rate_{200}$  for benzene oxidation showed a positive correlation with the total  $H_2$  consumption, indicating that the oxidation of benzene was more depended on the reducibility of the catalysts (Fig. S18D). However, for the chlorinated aromatics combustion, the  $Rate_{220}$  or  $Rate_{250}$  showed a distinct tendency. Fig. S18D also showed  $TOF_{(Cr)}$  at 250 °C as a function of  $H_2$  consumption over Co/Cr=2-5, the  $TOF_{(Cr)}$  increased with the raise of Co/Cr ratio, meaning that  $Co_3O_4$  species with high reducibility showed high activity for 1, 2-dichlorobenzene oxidation.

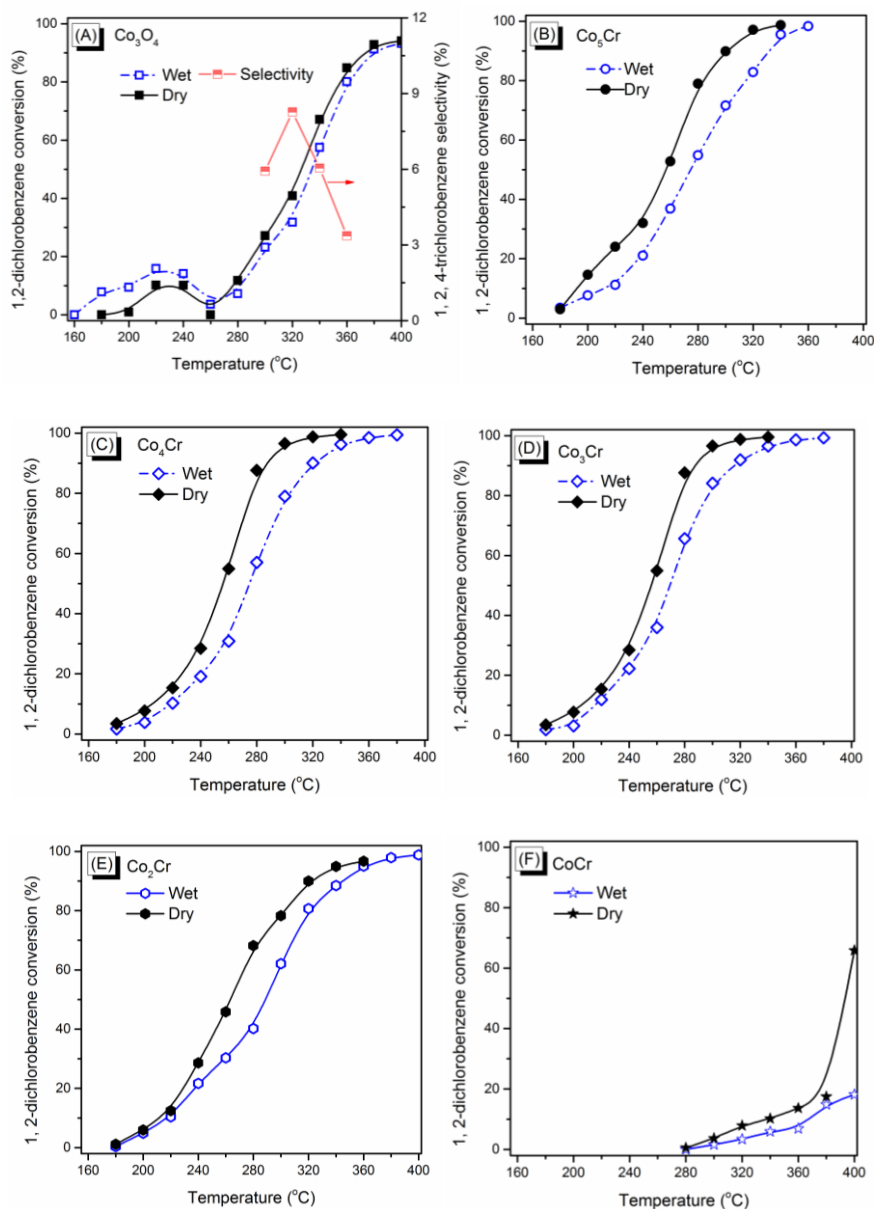

**Fig. S19** The effect of water on 1, 2-dichlorobenzene catalytic combustion over synthesized catalysts (A:  $\text{Co}_3\text{O}_4$ , B:  $\text{Co}_5\text{Cr}$ , C:  $\text{Co}_4\text{Cr}$ , D:  $\text{Co}_3\text{Cr}$ , E:  $\text{Co}_2\text{Cr}$ , F:  $\text{CoCr}$ ); Gas composition: 1, 2-dichlorobenzene 1000 ppm+ 3 vol. % water (only using for wet condition); 10 vol. %  $\text{O}_2$  and  $\text{N}_2$  balance; GHSV =  $60000 \text{ mL g}^{-1} \text{ h}^{-1}$ .
